# Supplementary material
Source: Research Square preprint supplement (doi:10.21203/rs.3.rs-9020274/v1)
Supplement: Supplementary file 1 [file 9fbe43b8fb9159770ca17023.xlsx]

## Sheet: Figure 1a_b
SDG region	Urban centre size	Total urban centre count	Total population (urban centres)	Total flooded centres (count)	Cumulative chronic population exposure	Cumulative chronic economic exposure
Australia and New Zealand	Large	NaN	NaN	NaN	NaN	NaN
Australia and New Zealand	Megacity	NaN	NaN	NaN	NaN	NaN
Australia and New Zealand	Very small	35	3332876	22	20529.5	8.70573e+08
Australia and New Zealand	Medium	5	12723282	5	20358.1	8.44036e+08
Australia and New Zealand	Small	4	1996515	4	7527.26	3.38689e+08
Central and Southern Asia	Very small	2346	244352584	1682	1.2446e+07	5.93706e+10
Central and Southern Asia	Medium	92	188931601	90	6.72571e+06	4.67364e+10
Central and Southern Asia	Small	436	199405937	381	5.00412e+06	2.69399e+10
Central and Southern Asia	Large	13	90605973	13	2.06313e+06	1.46646e+10
Central and Southern Asia	Megacity	8	174456553	8	882153	9.94522e+09
Eastern and South-Eastern Asia	Very small	2466	257430109	1759	2.71664e+07	2.26816e+11
Eastern and South-Eastern Asia	Small	510	241376196	455	2.04326e+07	4.02629e+11
Eastern and South-Eastern Asia	Megacity	12	282039992	12	7.41583e+06	1.43046e+11
Eastern and South-Eastern Asia	Medium	112	227296717	109	5.60881e+06	1.62122e+11
Eastern and South-Eastern Asia	Large	17	118823834	17	591394	1.21945e+10
Europe	Very small	928	95350932	139	1.39815e+06	4.44818e+10
Europe	Medium	42	78527167	17	58064.9	1.75327e+09
Europe	Small	191	88273674	56	56216.3	1.506e+09
Europe	Megacity	2	24788572	1	11243.4	6.07465e+08
Europe	Large	2	15006156	1	118.497	5.57382e+06
Latin America and the Caribbean	Very small	851	86122166	531	6.10099e+06	1.03415e+11
Latin America and the Caribbean	Medium	54	111317039	51	4.98048e+06	6.69436e+10
Latin America and the Caribbean	Small	177	81667702	137	4.67801e+06	2.67303e+10
Latin America and the Caribbean	Megacity	5	72540531	5	189661	4.12553e+09
Latin America and the Caribbean	Large	2	16484646	2	113394	2.32978e+09
Northern Africa and Western Asia	Very small	826	85170144	397	2.7126e+06	2.13612e+10
Northern Africa and Western Asia	Small	154	73499190	118	1.47136e+06	1.31289e+10
Northern Africa and Western Asia	Medium	50	98096662	47	861969	1.213e+10
Northern Africa and Western Asia	Large	6	41641719	6	105409	1.41474e+09
Northern Africa and Western Asia	Megacity	2	39436155	2	32542.4	5.85784e+08
Northern America	Small	62	29032302	20	275948	1.51414e+10
Northern America	Very small	306	32017410	70	201154	1.33509e+10
Northern America	Megacity	2	27668266	2	133562	1.11095e+10
Northern America	Medium	25	53540876	16	47168.5	3.41686e+09
Northern America	Large	3	16614303	2	3500.69	1.93951e+08
Oceania	Medium	NaN	NaN	NaN	NaN	NaN
Oceania	Large	NaN	NaN	NaN	NaN	NaN
Oceania	Megacity	NaN	NaN	NaN	NaN	NaN
Oceania	Very small	17	1672683	17	266142	1.25869e+09
Oceania	Small	1	442162	1	113122	1.22554e+09
Sub-Saharan Africa	Small	225	101781298	208	2.15725e+07	9.97025e+10
Sub-Saharan Africa	Very small	1363	139422875	988	1.77062e+07	6.38369e+10
Sub-Saharan Africa	Medium	57	127088244	54	1.41558e+07	4.49599e+10
Sub-Saharan Africa	Large	10	65322820	10	2.72574e+06	1.39672e+10
Sub-Saharan Africa	Megacity	3	37460301	3	2.08784e+06	1.73827e+10

## Sheet: Figure 2a_b
WB development group	Urban centre size	Total urban centre count	Total population (urban centres)	Total flooded centres	Cumulatve chronic population exposure
Low income	Megacity	1	12944300	1	295778
Low income	Large	4	25822276	4	996469
Low income	Small	123	54175649	104	4.403e+06
Low income	Medium	30	69099639	30	9.89854e+06
Low income	Very small	892	91074225	645	1.32743e+07
Lower Middle	Large	23	154488143	23	4.11381e+06
Lower Middle	Megacity	13	264673175	13	8.54557e+06
Lower Middle	Medium	150	309226614	141	1.41985e+07
Lower Middle	Small	685	310456683	606	3.32002e+07
Lower Middle	Very small	3722	384510603	2600	3.70918e+07
Upper Middle	Large	16	115445056	16	350139
Upper Middle	Megacity	14	274633887	13	495201
Upper Middle	Medium	171	341332482	161	7.03187e+06
Upper Middle	Small	699	336639351	563	9.67987e+06
Upper Middle	Very small	3280	339974530	2053	1.05828e+07
High income	Large	10	68743976	8	142272
High income	Medium	86	177862853	57	1.32938e+06
High income	Megacity	6	106139007	6	1.41628e+06
High income	Small	253	116203293	107	6.32827e+06
High income	Very small	1244	129312422	307	7.06923e+06

## Sheet: Figure 3a
SDG region	WB development group	Cumulative chronic population exposure total_4326	Cumulative chronic population exposure total_54009
Sub-Saharan Africa	Lower Middle	3.78084e+07	3.74552e+07
Eastern and South-Eastern Asia	Lower Middle	2.88678e+07	2.90706e+07
Central and Southern Asia	Lower Middle	2.44514e+07	2.3381e+07
Sub-Saharan Africa	Low income	1.99613e+07	1.93525e+07
Eastern and South-Eastern Asia	Upper Middle	1.63595e+07	1.60637e+07
Eastern and South-Eastern Asia	High income	1.03126e+07	1.02369e+07
Latin America and the Caribbean	Upper Middle	7.91426e+06	7.73345e+06
Eastern and South-Eastern Asia	Low income	5.67511e+06	5.5459e+06
Latin America and the Caribbean	Lower Middle	4.48256e+06	4.45119e+06
Latin America and the Caribbean	High income	3.66573e+06	3.6554e+06
Northern Africa and Western Asia	Upper Middle	2.95121e+06	2.91778e+06
Central and Southern Asia	Low income	2.34116e+06	2.27736e+06
Europe	High income	1.3729e+06	1.36908e+06
Northern Africa and Western Asia	Lower Middle	1.13677e+06	1.1074e+06
Northern Africa and Western Asia	Low income	890479	835899
Northern America	High income	661333	616033
Sub-Saharan Africa	Upper Middle	467549	415241
Oceania	Lower Middle	359220	346019
Central and Southern Asia	Upper Middle	328492	314572
Northern Africa and Western Asia	High income	205426	197957
Europe	Upper Middle	107126	102167
Australia and New Zealand	High income	48414.9	42098.8
Europe	Lower Middle	43769.4	42193.1
Oceania	Upper Middle	11778.4	11676
Sub-Saharan Africa	High income	10764.4	0
Oceania	High income	8266	8595.89

## Sheet: Figure 4a
SDG region	WB development group	2025 GDP per capita	2020 GDP per capita
Australia and New Zealand	High income	42228.7	45002.3
Central and Southern Asia	Low income	1348.21	1551.95
Central and Southern Asia	Lower Middle	5407.73	5495.02
Central and Southern Asia	Upper Middle	22272.3	23923.9
Eastern and South-Eastern Asia	High income	40276.6	38961.7
Eastern and South-Eastern Asia	Low income	1784.36	1784.84
Eastern and South-Eastern Asia	Lower Middle	6423.59	6805.65
Eastern and South-Eastern Asia	Upper Middle	14126.9	13964.8
Europe	High income	42103.8	42387
Europe	Lower Middle	13188.8	11555.2
Europe	Upper Middle	23352.9	22872.3
Latin America and the Caribbean	High income	22839.3	23461.2
Latin America and the Caribbean	Lower Middle	4753.04	4989.92
Latin America and the Caribbean	Upper Middle	11895.4	12376.5
Northern Africa and Western Asia	High income	48060.5	49472.2
Northern Africa and Western Asia	Low income	2173.24	2466.94
Northern Africa and Western Asia	Lower Middle	9157.48	9565.16
Northern Africa and Western Asia	Upper Middle	16104.9	17037.7
Northern America	High income	57643.3	59546.9
Oceania	High income	27306.5	28883.9
Oceania	Lower Middle	4881.06	5861.88
Oceania	Upper Middle	9300.52	11430.3
Sub-Saharan Africa	High income	21356.1	21926.3
Sub-Saharan Africa	Low income	1303.02	1426.88
Sub-Saharan Africa	Lower Middle	3441.39	3791.11
Sub-Saharan Africa	Upper Middle	12388.9	13424.2

## Sheet: Figure 4b
SDG region	WB development group	2025 GDP exposure	2020 GDP exposure
Eastern and South-Eastern Asia	High income	3.9764e+11	3.86916e+11
Eastern and South-Eastern Asia	Upper Middle	3.11393e+11	3.14487e+11
Eastern and South-Eastern Asia	Lower Middle	2.27851e+11	2.30286e+11
Sub-Saharan Africa	Lower Middle	2.0059e+11	2.25427e+11
Central and Southern Asia	Lower Middle	1.49402e+11	1.54549e+11
Latin America and the Caribbean	Upper Middle	1.01018e+11	1.03078e+11
Latin America and the Caribbean	High income	8.61824e+10	8.79627e+10
Europe	High income	4.47128e+10	4.53879e+10
Northern America	High income	4.32126e+10	4.27618e+10
Sub-Saharan Africa	Low income	3.15023e+10	3.60234e+10
Northern Africa and Western Asia	Upper Middle	2.67991e+10	2.88866e+10
Latin America and the Caribbean	Lower Middle	1.63437e+10	1.69611e+10
Northern Africa and Western Asia	Lower Middle	1.15395e+10	1.1815e+10
Eastern and South-Eastern Asia	Low income	9.92397e+09	9.90846e+09
Northern Africa and Western Asia	High income	8.26212e+09	8.43641e+09
Sub-Saharan Africa	Upper Middle	7.51865e+09	8.04225e+09
Central and Southern Asia	Upper Middle	4.36788e+09	4.50109e+09
Central and Southern Asia	Low income	3.88686e+09	4.38384e+09
Europe	Upper Middle	2.96905e+09	2.91856e+09
Oceania	Lower Middle	2.09686e+09	2.10984e+09
Australia and New Zealand	High income	2.0533e+09	2.05263e+09
Northern Africa and Western Asia	Low income	2.01997e+09	2.2242e+09
Europe	Lower Middle	6.72244e+08	5.86019e+08
Oceania	High income	2.61982e+08	2.72552e+08
Sub-Saharan Africa	High income	2.37785e+08	2.44959e+08
Oceania	Upper Middle	1.25397e+08	1.22788e+08

## Sheet: Figure 4c
UCDB datasets	GDP (US$)	Population
2020	68354571742808	3489624819
2025	68837560354969	3682758164
count difference	482988612162	193133345
% similarity (2020 to 2025)	99	95

## Sheet: Figure 5
SDG region	WB development group	Undefended 10cm	Undefended 30cm	Defended 10cm	Defended 30cm
Sub-Saharan Africa	Lower Middle	5.37573e+07	3.80509e+07	2.93931e+07	1.97124e+07
Sub-Saharan Africa	Low income	2.81993e+07	2.27593e+07	1.85767e+07	1.46147e+07
Eastern and South-Eastern Asia	Lower Middle	1.33457e+08	1.04409e+08	1.55095e+07	1.04609e+07
Central and Southern Asia	Lower Middle	4.51671e+08	3.23106e+08	1.11679e+07	6.1898e+06
Northern Africa and Western Asia	Upper Middle	1.54443e+07	8.44086e+06	1.43818e+06	732424
Central and Southern Asia	Low income	762869	500553	615649	430205
Latin America and the Caribbean	Upper Middle	5.25211e+07	3.60833e+07	537353	389166
Northern Africa and Western Asia	Low income	2.99723e+06	939276	1.49216e+06	382632
Eastern and South-Eastern Asia	Upper Middle	3.17585e+08	2.18175e+08	1.44088e+06	259362
Eastern and South-Eastern Asia	Low income	1.77775e+06	1.23187e+06	339102	202908
Northern Africa and Western Asia	Lower Middle	2.65198e+07	1.75044e+07	193007	88839.2
Europe	Upper Middle	1.00125e+07	5.99898e+06	57864	38886.3
Europe	Lower Middle	867858	601015	48422	35326.7
Sub-Saharan Africa	Upper Middle	1.31772e+06	1.01939e+06	33289.6	26883.1
Europe	High income	6.12985e+07	4.50182e+07	44437.2	20037.7
Northern America	High income	1.70064e+07	1.22541e+07	29951.1	9978.84
Latin America and the Caribbean	Lower Middle	866416	459644	13296.2	9759.93
Oceania	Lower Middle	9316.31	7921.07	9316.31	7921.07
Northern Africa and Western Asia	High income	880414	432309	347.607	283.04
Central and Southern Asia	Upper Middle	420628	224856	1009.03	226.042
Australia and New Zealand	High income	495879	388286	0	0
Eastern and South-Eastern Asia	High income	1.86135e+07	1.03674e+07	0	0
Latin America and the Caribbean	High income	1.19618e+06	977240	0	0

## Sheet: Figure 6a
SDG region	WB development group	Fluvial 10cm	Fluvial 30cm	Coastal 10cm	Coastal 30cm
Australia and New Zealand	High income	0	0	461.357	366.654
Central and Southern Asia	Upper Middle	1009.03	226.042	427409	309616
Central and Southern Asia	Lower Middle	1.1168e+07	6.1898e+06	1.12024e+06	687895
Central and Southern Asia	Low income	615649	430205	0	0
Eastern and South-Eastern Asia	High income	0	0	7.50429e+06	6.57835e+06
Eastern and South-Eastern Asia	Upper Middle	1.44091e+06	259362	5.03863e+06	4.27017e+06
Eastern and South-Eastern Asia	Lower Middle	1.55095e+07	1.04609e+07	2.22948e+07	1.50255e+07
Eastern and South-Eastern Asia	Low income	339106	202908	605461	286369
Europe	High income	44468.7	20037.7	1.25201e+06	1.23846e+06
Europe	Upper Middle	57909.2	38886.3	2730.64	1712.67
Europe	Lower Middle	48429.7	35326.7	18156.7	6500.3
Latin America and the Caribbean	High income	0	0	3.82228e+06	3.58116e+06
Latin America and the Caribbean	Upper Middle	537401	389166	5.79923e+06	4.0095e+06
Latin America and the Caribbean	Lower Middle	13296.2	9759.93	5.15502e+06	4.28564e+06
Northern Africa and Western Asia	High income	347.607	283.04	13968.6	9345.09
Northern Africa and Western Asia	Upper Middle	1.43819e+06	732424	130599	24376.8
Northern Africa and Western Asia	Lower Middle	193013	88839.2	691334	189129
Northern Africa and Western Asia	Low income	1.49217e+06	382632	141206	50404.3
Northern America	High income	30019.3	9978.84	328589	163541
Oceania	High income	0	0	0	0
Oceania	Upper Middle	0	0	2351.4	2289.17
Oceania	Lower Middle	9316.31	7921.07	131421	109969
Sub-Saharan Africa	High income	0	0	35.1137	29.8696
Sub-Saharan Africa	Upper Middle	33291.2	26883.1	326264	192113
Sub-Saharan Africa	Lower Middle	2.93932e+07	1.97124e+07	2.06923e+07	1.53303e+07
Sub-Saharan Africa	Low income	1.85768e+07	1.46147e+07	2.90976e+06	2.14336e+06

## Sheet: Figure 6b
SDG region	WB development group	Pluvial 10cm	Pluvial 30cm
Australia and New Zealand	High income	231549	48072.7
Central and Southern Asia	Upper Middle	202851	18696.5
Central and Southern Asia	Lower Middle	1.57203e+08	1.75749e+07
Central and Southern Asia	Low income	7.17161e+06	1.91099e+06
Eastern and South-Eastern Asia	High income	1.63743e+07	3.73441e+06
Eastern and South-Eastern Asia	Upper Middle	7.41943e+07	1.18317e+07
Eastern and South-Eastern Asia	Lower Middle	2.41402e+07	3.38146e+06
Eastern and South-Eastern Asia	Low income	1.44551e+07	5.18585e+06
Europe	High income	247658	114908
Europe	Upper Middle	496077	66816.8
Europe	Lower Middle	6794.8	1945.9
Latin America and the Caribbean	High income	387183	84585.5
Latin America and the Caribbean	Upper Middle	1.96932e+07	3.51625e+06
Latin America and the Caribbean	Lower Middle	1.48181e+06	187172
Northern Africa and Western Asia	High income	1.82324e+06	195893
Northern Africa and Western Asia	Upper Middle	9.89809e+06	2.19467e+06
Northern Africa and Western Asia	Lower Middle	1.27571e+07	858937
Northern Africa and Western Asia	Low income	4.55162e+06	457527
Northern America	High income	1.29022e+06	488068
Oceania	High income	84071.2	8266
Oceania	Upper Middle	56916.1	9489.18
Oceania	Lower Middle	538945	241330
Sub-Saharan Africa	High income	29601.4	10734.5
Sub-Saharan Africa	Upper Middle	1.34114e+06	248643
Sub-Saharan Africa	Lower Middle	2.35759e+07	2.76592e+06
Sub-Saharan Africa	Low income	1.54409e+07	3.20359e+06

## Sheet: Figure 7a
SDG region	WB development group	Multi-peril	Combined peril total
Sub-Saharan Africa	Lower Middle	3.76068e+07	3.78084e+07
Eastern and South-Eastern Asia	Lower Middle	2.82957e+07	2.88678e+07
Central and Southern Asia	Lower Middle	2.43524e+07	2.44514e+07
Sub-Saharan Africa	Low income	1.98975e+07	1.99613e+07
Eastern and South-Eastern Asia	Upper Middle	1.63556e+07	1.63595e+07
Eastern and South-Eastern Asia	High income	1.03117e+07	1.03126e+07
Latin America and the Caribbean	Upper Middle	7.91332e+06	7.91426e+06
Eastern and South-Eastern Asia	Low income	5.54086e+06	5.67511e+06
Latin America and the Caribbean	Lower Middle	4.48148e+06	4.48256e+06
Latin America and the Caribbean	High income	3.66573e+06	3.66573e+06
Northern Africa and Western Asia	Upper Middle	2.95079e+06	2.95121e+06
Central and Southern Asia	Low income	2.14655e+06	2.34116e+06
Europe	High income	1.3729e+06	1.3729e+06
Northern Africa and Western Asia	Lower Middle	1.12482e+06	1.13677e+06
Northern Africa and Western Asia	Low income	883040	890479
Northern America	High income	661223	661333
Sub-Saharan Africa	Upper Middle	463812	467549
Oceania	Lower Middle	358799	359220
Central and Southern Asia	Upper Middle	328492	328492
Northern Africa and Western Asia	High income	205424	205426
Europe	Upper Middle	107126	107126
Australia and New Zealand	High income	48414.8	48414.9
Europe	Lower Middle	43765.9	43769.4
Oceania	Upper Middle	11778.4	11778.4
Sub-Saharan Africa	High income	10738.5	10764.4
Oceania	High income	8266	8266

[truncated: 2 more sheets: Figure 7b, Figure 7c]
